# Supplementary material for: Continuous in vivo Metabolism by NMR
Source: PubMed Central journal article supplement (PMC6502900; doi:10.3389/fmolb.2019.00026), 2019-04-30
Supplement: Image_1.pdf [file Image_1.pdf]

## Supplementary Material

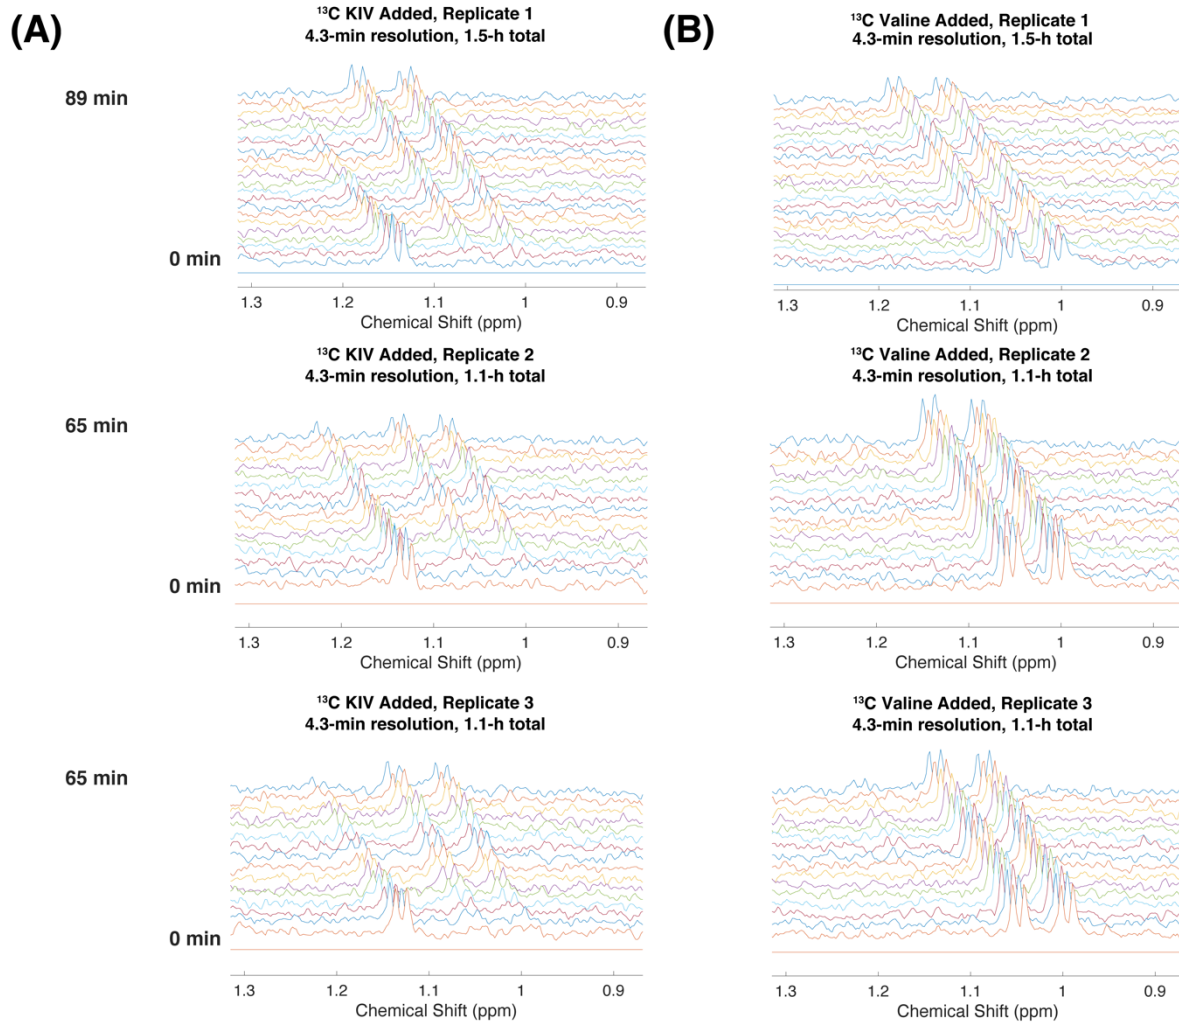

**Supplementary Figure 1. Targeted isotopic CIVM-NMR measurements of metabolic flux in human myeloid leukemia cells are reproducible. (A)** 1D <sup>13</sup>C-edited hsqc experiments were used to observe protons covalently attached to <sup>13</sup>C derived from uniformly labeled KIV in three independent replicates. <sup>13</sup>C valine accumulates as KIV is consumed. **(B)** The same experiments were used to observe protons covalently attached to <sup>13</sup>C derived from uniformly labeled valine in three independent replicates. <sup>13</sup>C derived from uniformly labeled valine does not accumulate to appreciable levels in KIV.
