# Supplementary material for: Continuous in vivo Metabolism by NMR
Source: PubMed Central journal article supplement (PMC6502900; doi:10.3389/fmolb.2019.00026), 2019-04-30
Supplement: Image_2.pdf [file Image_2.pdf]

## *Supplementary Material*

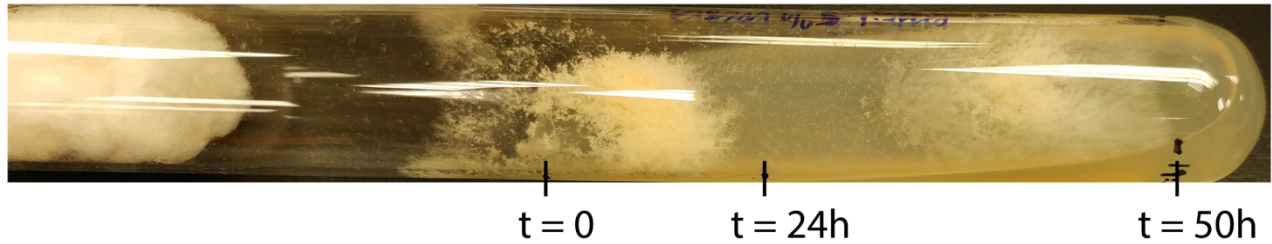

**Supplementary Figure 2.** Growth of *N. crassa* after a CIVM-NMR experiment. A piece of mycelium was used to inoculate a growth slant at  $t = 0$ . The culture was kept on the bench and the advancement of the growth front was marked at  $t = 0$  h, 24 h and 50 h. Roughly circadian conidiation was observed between 0 h and 24 h, and again before the 50-h mark.
