# Supplementary material for: Continuous in vivo Metabolism by NMR
Source: PubMed Central journal article supplement (PMC6502900; doi:10.3389/fmolb.2019.00026), 2019-04-30
Supplement: Image_3.pdf [file Image_3.pdf]

## *Supplementary Material*

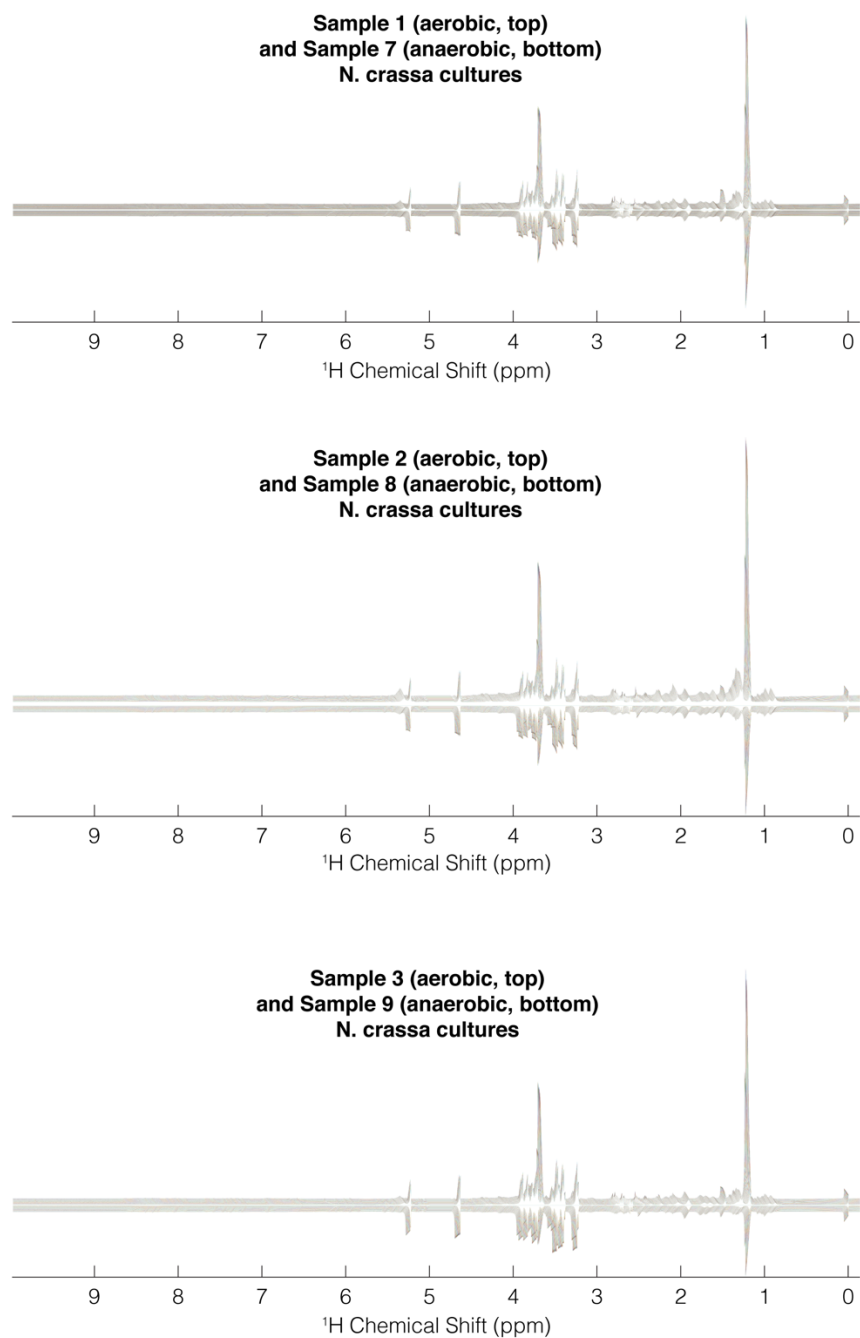

**Supplementary Figure 3.** Comparison of aerobic and anaerobic samples for three independent replicates. Replicates 1,2,3 (aerobic) are plotted against mirror images of replicates 7,8,9 (anaerobic).
