# Supplementary material for: Continuous in vivo Metabolism by NMR
Source: PubMed Central journal article supplement (PMC6502900; doi:10.3389/fmolb.2019.00026), 2019-04-30
Supplement: Image_6.pdf [file Image_6.pdf]

## Supplementary Material

(A)

### Malate Annotated in Endpoint Extract by COLMARM

| Peak | database 1H | database 13C | exp 1H | exp 13C |
|------|-------------|--------------|--------|---------|
| 0    | 2.36        | 45.32        | 2.35   | 45.15   |
| 1    | 2.66        | 45.32        | 2.66   | 45.16   |
| 2    | 4.29        | 73.06        | 4.29   | 72.97   |

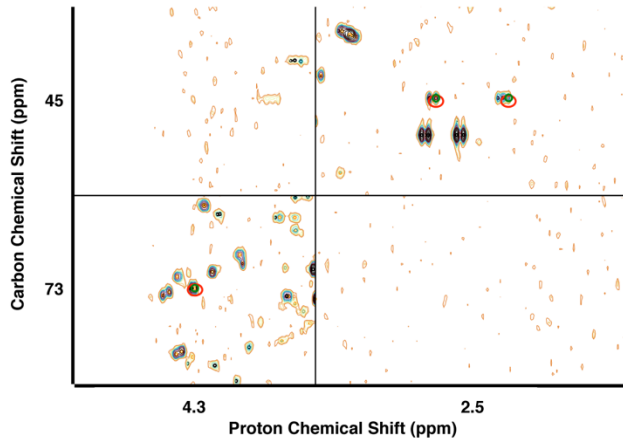

(B)

### Putative Glutamine Annotation in *in-vivo* data

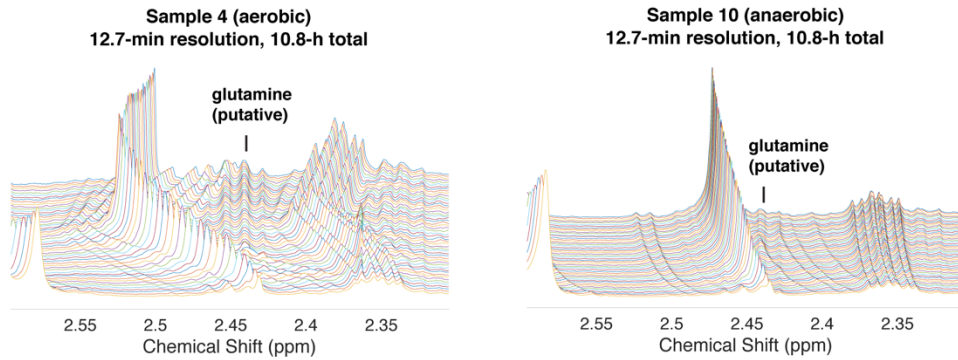

(C)

### UDP-GlcNAc and UDP-Glc qualitative changes in *in-vivo* data

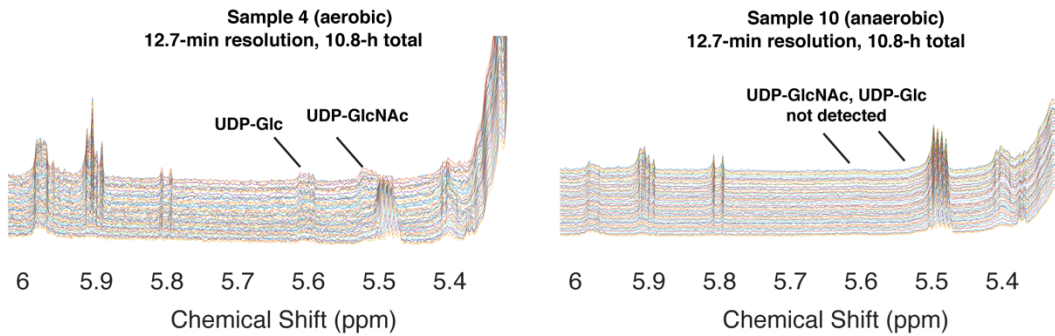

**Supplementary Figure 6.** Qualitative assessment for unquantifiable metabolites in this study. **(A)** Malate was annotated in the 2D data for endpoint extracts by peak matching to databases using COLMARm<sup>1</sup>. Positions of matched peaks are indicated with a red ellipse and in the peak table. **(B)** Peaks consistent with glutamine increased in the aerobic and may be present in the anaerobic condition. **(C)** UDP-GlcNAc (UDP-N-Acetyl Glucosamine; UDP-NAG) and UDP-Glc (UDP-Glucose) were annotated in the aerobic condition but could not be traced reliably.
