# Supplementary material for: Continuous in vivo Metabolism by NMR
Source: PubMed Central journal article supplement (PMC6502900; doi:10.3389/fmolb.2019.00026), 2019-04-30
Supplement: Image_7.pdf [file Image_7.pdf]

## Supplementary Material

**$^{13}\text{C}$  Glucose, 83mM, Aerobic, Replicate 1**

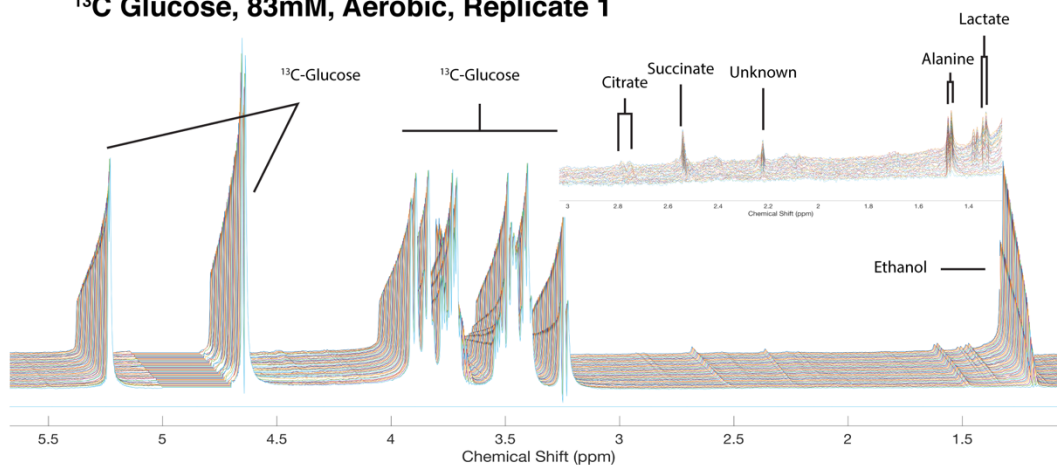

**$^{13}\text{C}$  Glucose, 83mM, Aerobic, Replicate 2**

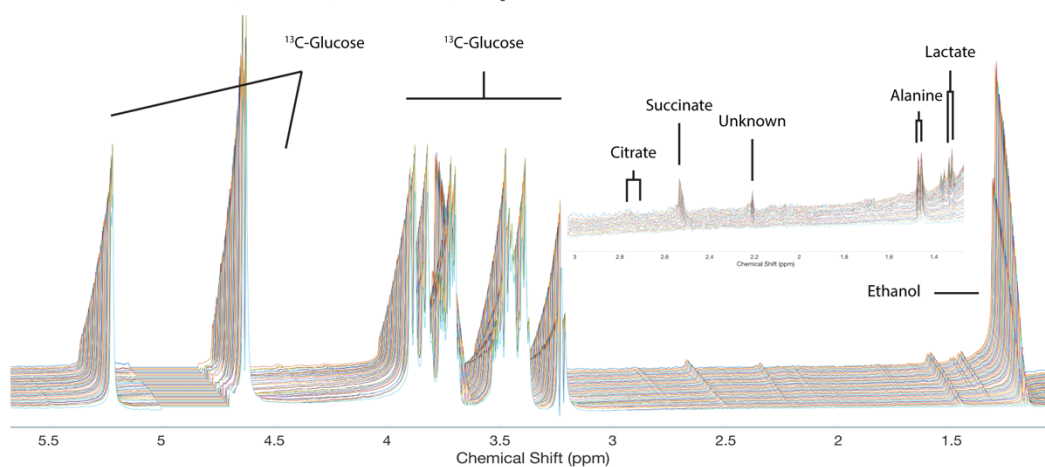

**$^{13}\text{C}$  Glucose, 83mM, Aerobic, Replicate 3**

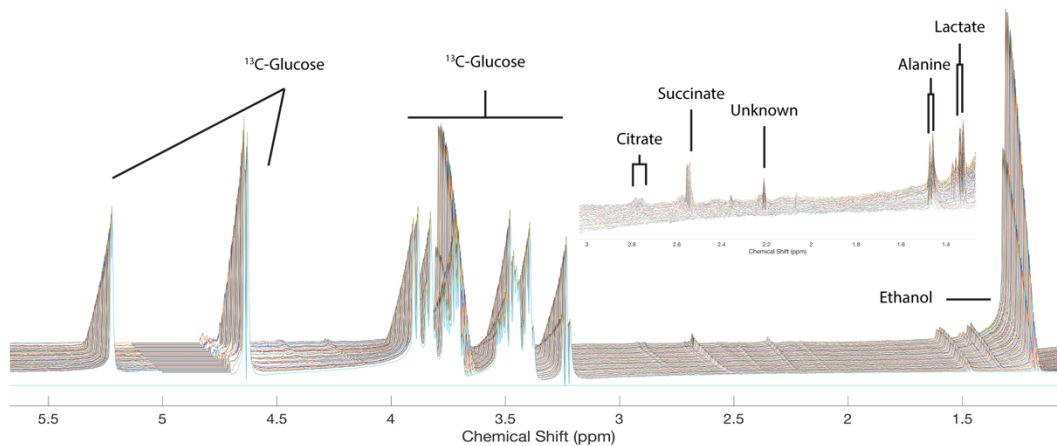

**Supplementary Figure 7.** Accumulation of  $^{13}\text{C}$ -labeled metabolites in three independent replicate aerobic *N. crassa* cultures. hmqc1d NMR experiments were used to monitor the accumulation of  $^{13}\text{C}$ -labeled metabolites after addition of uniformly labeled  $^{13}\text{C}$  glucose. Glucose was converted to ethanol, alanine, succinate, and lactate, citrate, and some peaks that have yet to be identified.
