# Supplementary material for: Continuous in vivo Metabolism by NMR
Source: PubMed Central journal article supplement (PMC6502900; doi:10.3389/fmolb.2019.00026), 2019-04-30
Supplement: Image_8.pdf [file Image_8.pdf]

## Supplementary Material

(A)

**Small peak 3 in Sample 4 (Evaluated at spectrum 7)**

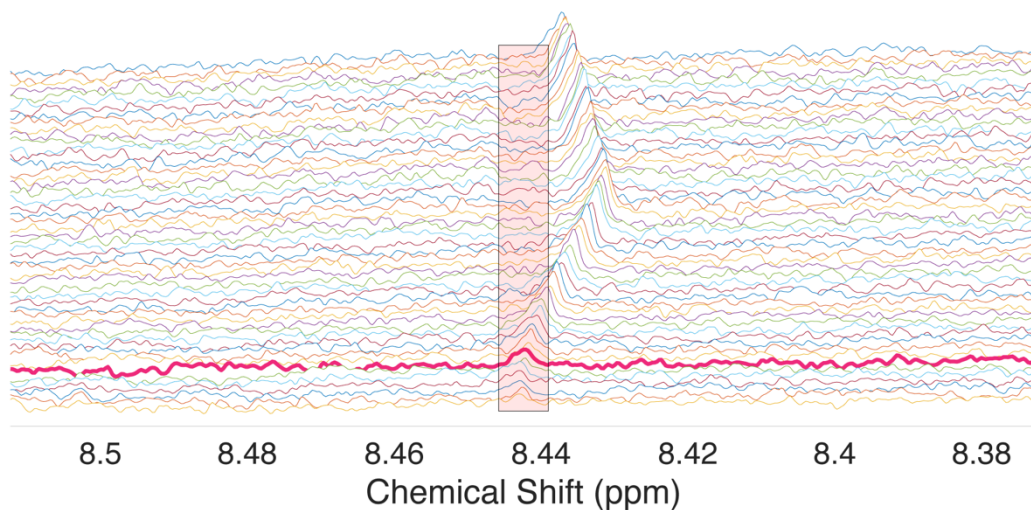

**Small peak 2 in Sample 4 (Evaluated at spectrum 29)**

(B)

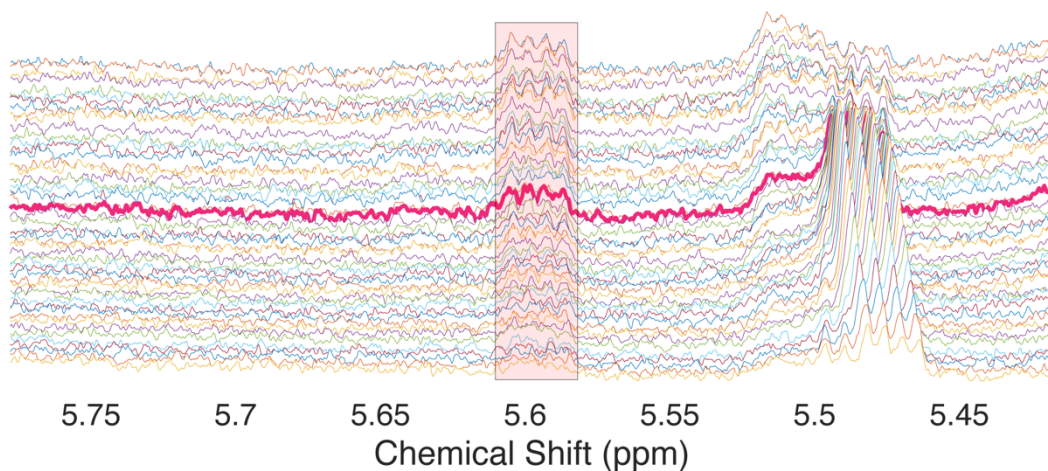

(C)

|                    | Small Peak | Annotation                  | Integral (Peak) | Integral (DSS) | [1H] (mM)* |
|--------------------|------------|-----------------------------|-----------------|----------------|------------|
| Individual Spectra | 1          | unknown                     | 00.212          | 0047.526       | 0.036      |
|                    | 2          | UDP-NAG (whole multiplet)   | 01.474          | 0048.040       | 0.246      |
|                    | 2          | UDP-NAG (quarter multiplet) | -               | -              | 0.062      |
|                    | 3          | formate                     | 00.145          | 0048.350       | 0.024      |
| Summed Spectra     | 1          | unknown                     | 20.910          | 2466.623       | 0.068      |
|                    | 2          | UDP-NAG                     | 69.245          | 2466.623       | 0.225      |

\* [1H] (mM) = (Peak Integral) / (DSS Peak Integral) \* (0.89 mM \* 9 DSS protons)

**Supplementary Figure 8.** Estimation of sensitivity for CIVM-NMR using our HR-MAS probe in an aerobic sample. **(A)** Formate peak in spectrum 7 (bolded in magenta,  $t = 84.6$  min), where it became discernable from noise. **(B)** Similar result for a UDP-N-acetyl glucosamine peak in spectrum 29 ( $t = 363.8$  min). **(C)** Table of measured intensities and calculated concentrations of  $^1\text{H}$  based on the known concentration of DSS in the sample. Integrals were assessed using the boundaries shown by the pink box. Notably, formate and an unknown peak) of similar intensity (not shown) yielded similar concentrations of  $^1\text{H}$ , and these values are within a factor of  $\sim 2$  from the calculated potential sensitivity from one quarter of the UDP-N-acetylglucosamine peak.
